# Supplementary material for: Localized Cystic Disease of the Kidney in Pediatric Patients: Clinical and Imaging Findings With Long Term Follow Up
Source: Research Square preprint supplement (doi:10.21203/rs.3.rs-534087/v1), 2021-05-21
Supplement: Supplementary file 1 [file c239e3edc0b8b750b8290161.docx]

Supplementary Material 1. Literature review of pediatric patients with localized cystic disease of the kidney.

| Patient no. | Publication | Age at presentation (year) | Sex | Presenting symptoms | Types of management | Follow-up (month) | Family history | Laterality | Location | Hyperechoic foci on US | Cyst in contralateral kidney |
| --- | --- | --- | --- | --- | --- | --- | --- | --- | --- | --- | --- |
| 1 | Cho *et al* 1979 | 3 | F | hematuria, hypertension abdominal mass | nephrectomy |  | no | Rt | upper |  | - |
| 2 | Levin *et al* 1989 | 14 | M | asymptomatic | follow up | 84 | no | Lt | entire |  | - |
| 3 | Middlebrook *et al*. 1992 | 0 | F | asymptomatic | nephrectomy |  | no | Rt | entire | - | - |
| 4 | Dougougeat *et al*. 2000 | 15 | M | flank pain, orthostatic high BP | conservative treament |  | no | Lt | mid |  | - |
| 5 | Dougougeat *et al*. 2000 | 10 | M | Rt abdominal pain | follow up | 12 | father-nephrolithiasis | Lt | entire | - | - |
| 6 | Boybeyi *et al*. 2008 | 4.5 | F | UTI. | cyst excision |  | no | Rt | mid | - | - |
| 7 | Taskinen *et al*. 2009 | 0 | F | sepsis | partial nephrectomy |  | ? | Lt | upper | - | - |
| 8 | Neyaz *et al*. 2012 | 16 | M | abdominal pain | follow up |  | no | Rt | mid lower |  | - |
| 9 | Solak *et al*. 2013 | 16 | M | hypertension | partial nephrectomy |  | no | Rt | upper | + | - |
| 10 | Behr *et al*. 2016 | 6 | M | abdominal pain | nephrectomy |  | ? | Rt | inferior | + | - |
| 11 | Kaselas *et al* 2020. | 0 | M | asymptomatic | preoperative chemotherapy with nephrectomy |  | ? | Lt | mid |  | - |
